# Supplementary material for: Bacteria, Fungi, and Enzymes in Soil Treated with Sulcotrione and Terbuthylazine
Source: MDPI journal article supplement (doi:10.3390/ijms241914469), 2023-09-23
Supplement: s1 [file s1]

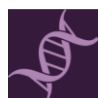

Supplementary material

# Bacteria, Fungi, and Enzymes in Soil Treated with Sulcotrione and Terbutylazine

Małgorzata Baćmaga, Jadwiga Wyszowska\*, Jan Kucharski and Agata Borowik

Department of Soil Science and Microbiology, Faculty of Agriculture and Forestry, University of Warmia and Mazury in Olsztyn, 10-719 Olsztyn, Poland; m.bacmaga@uwm.edu.pl (M.B.); agata.borowik@uwm.edu.pl (A.B.); jan.kucharski@uwm.edu.pl (J.K.)

\* Correspondence: jadwiga.wyszowska@uwm.edu.pl

**Table S1.** Effect of herbicides on abundance of soil microorganisms, cfu 10<sup>n</sup> kg<sup>-1</sup> d.m. soil.

| Object  | Org × 10 <sup>10</sup>    | Act × 10 <sup>10</sup>    | Fun × 10 <sup>8</sup>     |
|---------|---------------------------|---------------------------|---------------------------|
| C       | 1.328±0.055 <sup>d</sup>  | 1.438±0.101 <sup>c</sup>  | 0.692±0.009 <sup>bc</sup> |
| SulRD   | 1.745±0.133 <sup>ab</sup> | 1.674±0.038 <sup>b</sup>  | 0.710±0.004 <sup>b</sup>  |
| Sul10RD | 1.427±0.103 <sup>c</sup>  | 1.476±0.041 <sup>c</sup>  | 0.571±0.016 <sup>d</sup>  |
| TezRD   | 1.888±0.163 <sup>a</sup>  | 1.839±0.111 <sup>ab</sup> | 0.868±0.022 <sup>a</sup>  |
| Tez10RD | 1.521±0.098 <sup>bc</sup> | 1.253±0.065 <sup>d</sup>  | 0.620±0.020 <sup>cd</sup> |
| SucRD   | 1.782±0.055 <sup>ab</sup> | 1.244±0.123 <sup>d</sup>  | 0.752±0.092 <sup>b</sup>  |
| Suc10RD | 1.982±0.016 <sup>a</sup>  | 1.966±0.010 <sup>a</sup>  | 0.540±0.016 <sup>d</sup>  |

C—control soil; Sul—Sulcogan 300 SC; Tez—Tezosar 500 SC; Suc—Sulcotrek 500 SC; RD—dose recommended by the manufacturer; 10RD— dose 10-fold higher than recommended by the manufacturer; Org—organotrophic bacteria; Act—actinobacteria; Fun—fungi; ±—standard deviation. Homogeneous groups denoted by letters (a–d) were calculated separately for each group of microorganisms.

**Table S2.** Effect of herbicides on soil enzyme activity, kg<sup>-1</sup> d. m. soil h<sup>-1</sup>.

| Object  | Deh                        | Cat                      | Pal                      | Pac                      | Glu                      | Aryl                      | Ure                      |
|---------|----------------------------|--------------------------|--------------------------|--------------------------|--------------------------|---------------------------|--------------------------|
|         | μmol TFF                   | mol O <sub>2</sub>       | mmol PNP                 |                          |                          |                           | mmol N-NH <sub>4</sub>   |
| C       | 19.918±1.376 <sup>a</sup>  | 0.357±0.004 <sup>a</sup> | 0.335±0.016 <sup>c</sup> | 2.246±0.079 <sup>e</sup> | 0.248±0.008 <sup>a</sup> | 0.165±0.014 <sup>c</sup>  | 0.859±0.017 <sup>a</sup> |
| SulRD   | 17.097±0.300 <sup>b</sup>  | 0.358±0.004 <sup>a</sup> | 0.320±0.024 <sup>c</sup> | 2.421±0.015 <sup>e</sup> | 0.245±0.003 <sup>a</sup> | 0.227±0.002 <sup>a</sup>  | 0.659±0.017 <sup>b</sup> |
| Sul10RD | 16.827±0.237 <sup>b</sup>  | 0.340±0.011 <sup>b</sup> | 0.261±0.003 <sup>d</sup> | 2.743±0.010 <sup>b</sup> | 0.251±0.003 <sup>a</sup> | 0.245±0.003 <sup>a</sup>  | 0.567±0.003 <sup>c</sup> |
| TezRD   | 17.779±0.119 <sup>b</sup>  | 0.358±0.001 <sup>a</sup> | 0.389±0.021 <sup>b</sup> | 2.915±0.022 <sup>a</sup> | 0.249±0.006 <sup>a</sup> | 0.197±0.007 <sup>b</sup>  | 0.567±0.003 <sup>c</sup> |
| Tez10RD | 18.296±0.590 <sup>ab</sup> | 0.370±0.001 <sup>a</sup> | 0.485±0.019 <sup>a</sup> | 2.706±0.013 <sup>b</sup> | 0.231±0.002 <sup>b</sup> | 0.190±0.007 <sup>b</sup>  | 0.548±0.017 <sup>c</sup> |
| SucRD   | 17.691±0.060 <sup>b</sup>  | 0.367±0.001 <sup>a</sup> | 0.519±0.003 <sup>a</sup> | 2.595±0.032 <sup>c</sup> | 0.253±0.010 <sup>a</sup> | 0.198±0.007 <sup>b</sup>  | 0.620±0.017 <sup>b</sup> |
| Suc10RD | 18.353±0.658 <sup>ab</sup> | 0.339±0.007 <sup>b</sup> | 0.311±0.009 <sup>c</sup> | 2.794±0.013 <sup>b</sup> | 0.250±0.003 <sup>a</sup> | 0.182±0.003 <sup>bc</sup> | 0.421±0.017 <sup>d</sup> |

C—control soil; Sul—Sulcogan 300 SC; Tez—Tezosar 500 SC; Suc—Sulcotrek 500 SC; RD—dose recommended by the manufacturer; 10RD— dose 10-fold higher than recommended by the manufacturer; Deh—dehydrogenases, Cat—catalase, Pal—alkaline phosphatase, Pac—acid phosphatase, Glu—β-glucosidase, Aryl—arylsulfatase, Ure—urease; ±—standard deviation. Homogeneous groups denoted by letters (<sup>a-e</sup>) were calculated separately for each enzyme.

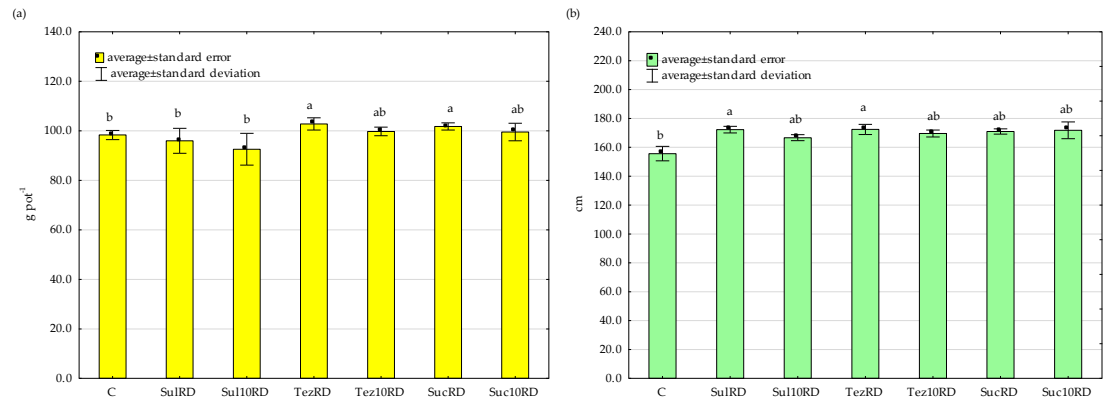

**Figure S1.** Effect of herbicides on (a) dry matter yield, and (b) length of aboveground parts of *Zea mays* L. C—control soil; Sul—Sulcogan 300 SC; Tez—Tezosar 500 SC; Suc—Sulcotrek 500 SC; RD—dose recommended by the manufacturer; 10RD— dose 10-fold higher than recommended by the manufacturer. Homogeneous groups denoted with letters (a-b).
